# Supplementary material for: Gradient release of cardiac morphogens by photo-responsive polymer micelles for gradient-mediated variation of embryoid body differentiation
Source: Royal Society of Chemistry journal article supplement (doi:10.1039/c7tb00880e), 2017-01-01
Supplement: c7tb00880e1.pdf [file c7tb00880e1.pdf]

## **Supporting Information**

### Gradient Release of Cardiac Morphogen by Photo-responsive Polymer Micelles for Gradient-mediated Variation of Embryoid Body Differentiation

*Mukesh K. Gupta<sup>1</sup>, Daniel A. Balikov<sup>1</sup>, Yunki Lee<sup>1</sup>, Edward Ko<sup>1</sup>, Christopher Yu<sup>1</sup>, Young Wook Chun<sup>1,2</sup>, Douglas B. Sawyer<sup>3</sup>, Won Shik Kim<sup>4</sup>, Hak-Joon Sung<sup>1,2,5,\*</sup>*

<sup>1</sup>Department of Biomedical Engineering, Vanderbilt University, Nashville, TN, USA.

<sup>2</sup>Division of Cardiovascular Medicine, Vanderbilt University Medical Center, TN, USA.

<sup>3</sup>Maine Medical Center and MaineHealth, ME, USA.

<sup>4</sup>Department of Otorhinolaryngology, College of Medicine, Yonsei University, Seoul, Republic of Korea.

<sup>5</sup>Severance Biomedical Science Institute, College of Medicine, Yonsei University, Seoul, Republic of Korea.

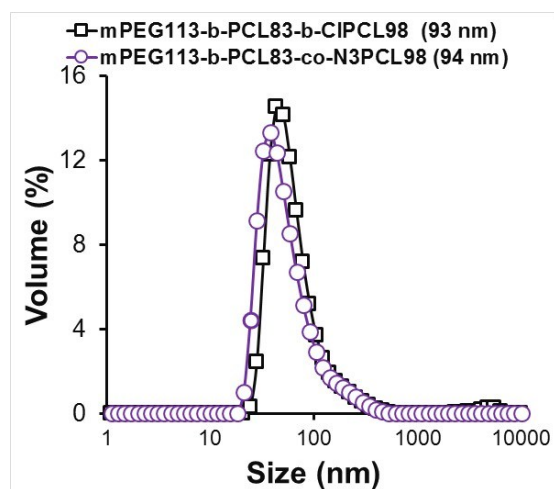

**Figure S1.** DLS-based size measurement of mPEG<sub>113</sub>-*b*-PCL<sub>83</sub>-*co*-CIPCL<sub>98</sub> and mPEG<sub>113</sub>-*b*-PCL<sub>83</sub>-*co*-N<sub>3</sub>PCL<sub>98</sub> micelles at 0.2 mg/mL in DPBS (pH 7.4).

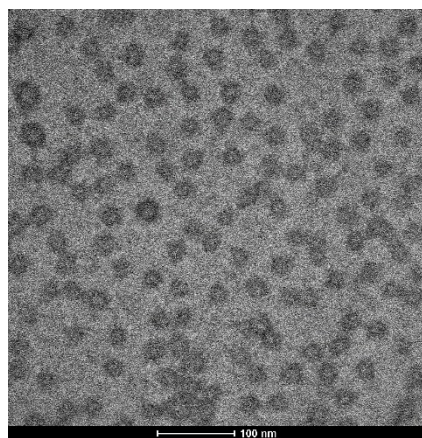

**Figure S2.** TEM images of mPEG<sub>113</sub>-*b*-PCL<sub>83</sub>-*co*-N<sub>3</sub>PCL<sub>98</sub>-*g*-ONB-RA micelles at 1 mg/mL concentration (DPBS, pH 7.4, 25 °C).

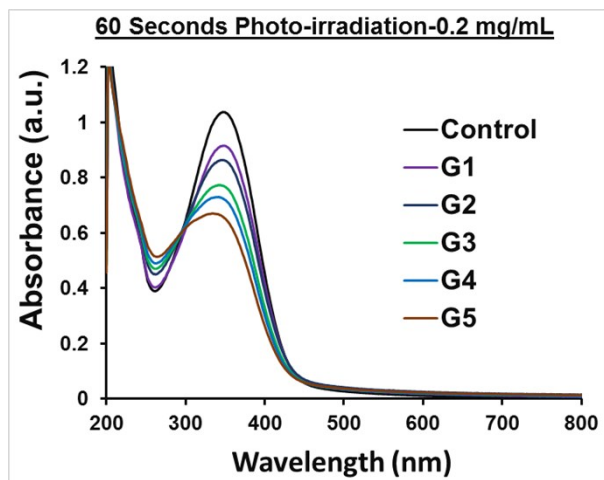

**Figure S3.** UV absorption spectra of mPEG<sub>113</sub>-b-PCL<sub>83</sub>-co-N<sub>3</sub>PCL<sub>98</sub>-g-ONB-RA micelles at 0.2 mg/mL before and after gradient-mediated exposure to UV light. A decrease in absorption for a specified gradient column compared to control was used for calculating the amount of RA released from polymer micelles.

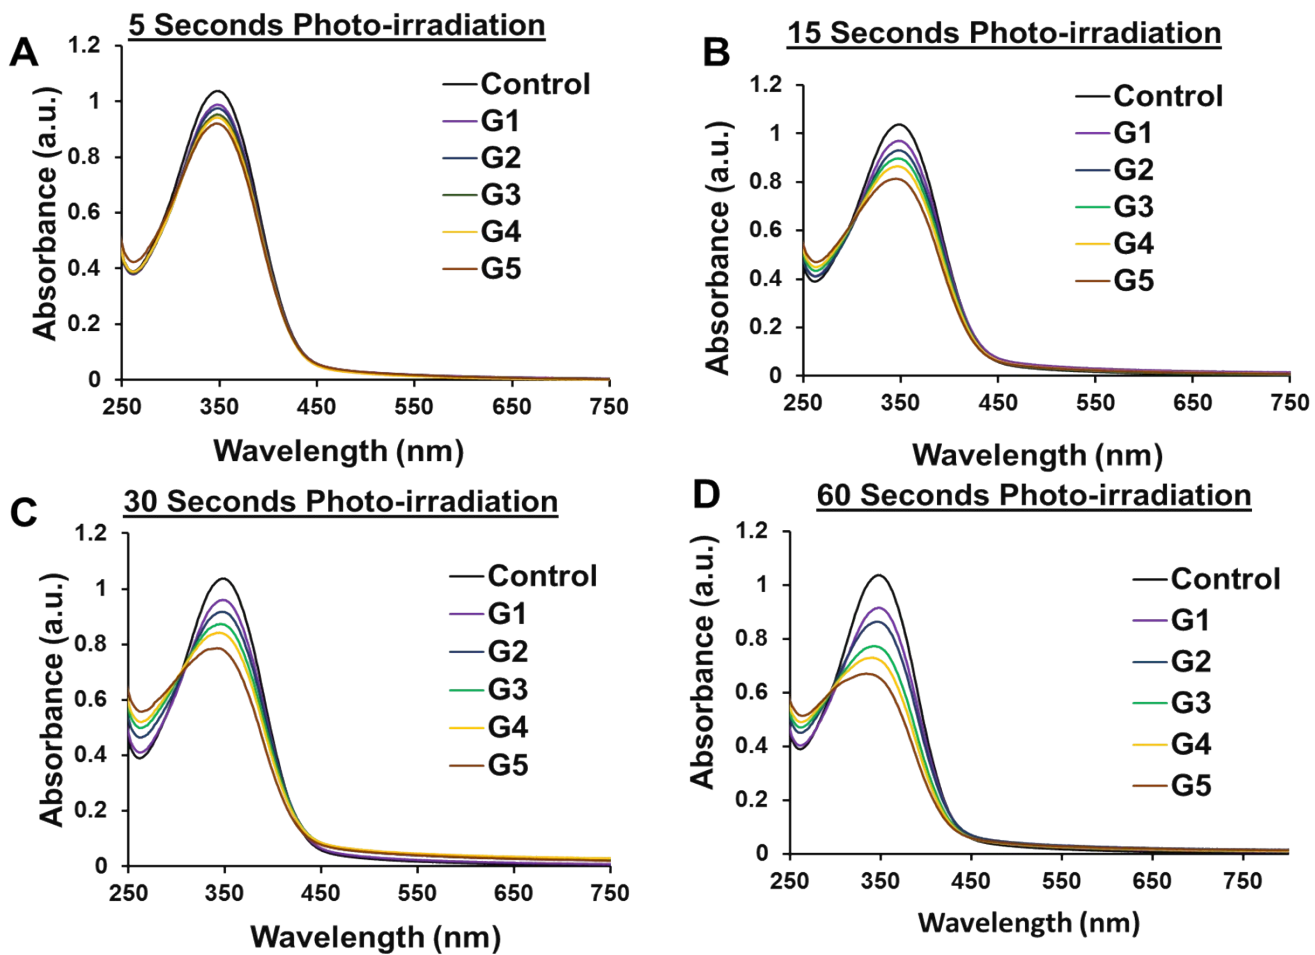

**Figure S4.** UV absorption spectra of mPEG<sub>113</sub>-b-PCL<sub>83</sub>-co-N<sub>3</sub>PCL<sub>98</sub>-g-ONB-RA micelles for time-dependent release of retinoic acid (0.2 mg/mL in DPBS, pH 7.4, 25 °C) through the photo-gradient. The gradient-mediated release data at (A) 5, (B) 15, (C) 30, and (D) 60 second time points demonstrate light intensity-dependent RA release from the polymer micelles.

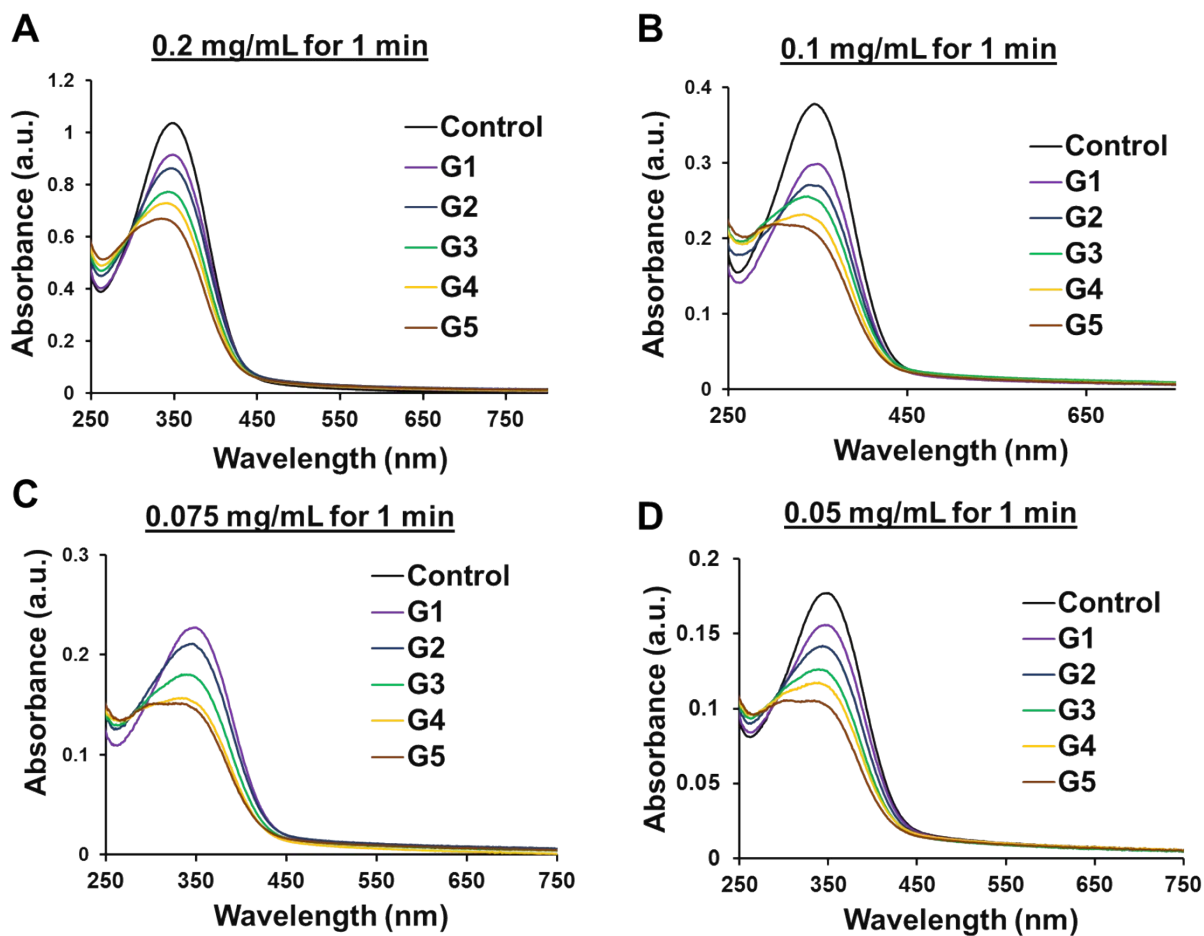

**Figure S5.** UV absorption spectra of mPEG<sub>113</sub>-b-PCL<sub>83</sub>-co-N<sub>3</sub>PCL<sub>98</sub>-g-ONB-RA micelles for concentration-dependent release of retinoic acid after 1 min photo-irradiation. Release of RA from polymer micelles at (A) 0.2, (B) 0.1, (C) 0.075, and (D) 0.05 mg/mL concentrations. All release conditions showed a similar RA release pattern that was dependent on light intensity passing through the photo-gradient.

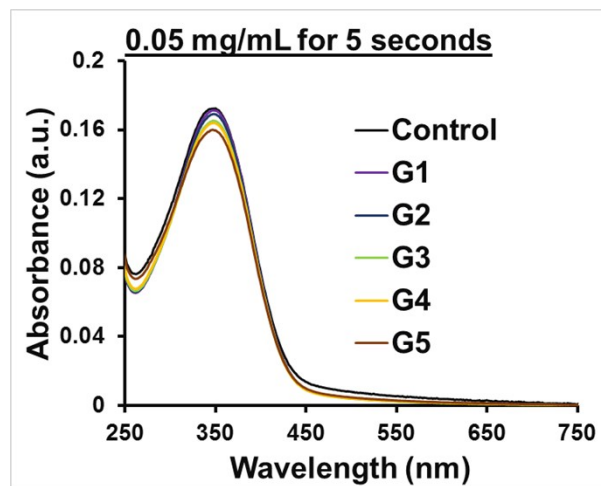

**Figure S6.** UV absorption spectra of mPEG<sub>113</sub>-b-PCL<sub>83</sub>-co-N<sub>3</sub>PCL<sub>98</sub>-g-ONB-RA micelles (0.05 mg/mL) before and after photo-gradient-mediated exposure for 5 seconds.
